# Supplementary material
Source: Springer Nature journal article supplement (http://www.springermedizin.de/resource/supplementary/13014_2013_787_MOESM1_ESM.pdf/9634738)

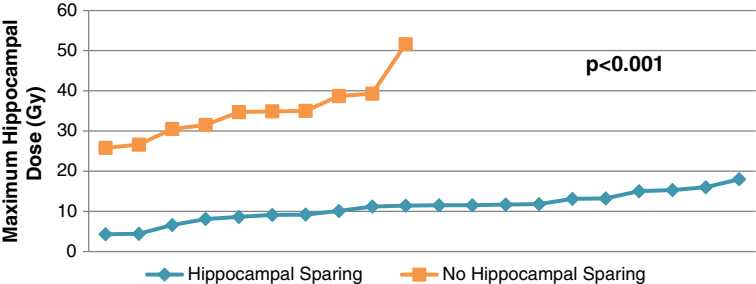

Supplement: MOESM1 [file 9634738]
